# Supplementary material for: Human Papillomavirus Prevalence in Oral and Oropharyngeal Rinse and Gargle Specimens of Dental Patients and of an HIV-Positive Cohort from Pretoria, South Africa
Source: Adv Virol. 2020 Aug 26;2020:2395219. doi: 10.1155/2020/2395219 (PMC7471795; doi:10.1155/2020/2395219)
Supplement: Supplementary Materials — (1) Raw dataset for the population groups included in the study. (2) Supplementary statistical analyses of data regarding high-risk behaviors in the study population. [file 2395219.f1.xlsx]

## Sheet: Rinse specimen data
NR	Study nr	Group	Age	Gender	Ethnic	region	HIV status	CD 4	VL	tonsil/bed	Ever Tob	Curr smoke	Nr p/d	Last smoke	snuff	snuff p/d	Snuff oral	sn oral p/d	Alch ever	Fav alch	last alch	week alch	unit/day	1st kiss	2 yr nr	last kiss	1st sex	know O/S						O/S p life	given to life	rec from life	O/S p curr	nr curr give to	nr curr rec from	last rec	last gave	last o/s	time betw give	time betw rec	Life sex p	O lesions	DNA concentration	catHPV06	catHPV11
1	OR001		26	2	3	Pta	0			0	0				0				1	1	4	2	2	2	1	6	2	1						0													14.43	0	0
2	OR002		31	2	1		0			0	0				0				0					2	2	2	2	0						1	1	1	1	1	1	2	2	4	6	2			2.96	0	0
3	OR003		30	2	1		0			0	0				0				0					2	5	2	2	1						1	1	1	1	1		3	3						4.07	0	0
4	OR004		54	1	1	Sosh	0			0	1	0			0				1	1	4	5	2	2	1	1	2	1						3	3	3	1	1	1	3	3						5.68	0	0
5	OR005		29	2	1	Gaut	0			0	0				0				1	2	4	1	2	2	4	3	2	1						1	3	3	1	3	1	6	5	5					12.25	0	0
6	OR006		36	1	1		0			0	1	1	6	1	0				1	1	4	2	2	1	4	4	1	1						2	5	1	1	1	1	4	8	4	9	9			87.59	0	0
7	OR007		28	2	1	Hamm	0			0	0				0				1	4	9			2	10	7	3	1						0													7.9	0	0
8	OR008		36	1	1	NW	0			0	1	0			0				1	2	3	10	10	2	10	1	2	1						4	4	4	1	1	4	5	8	5	1	1			2.49	0	0
9	OR009		28	1	1		0			0	1	1	1	5	0				1	1	4	3	2	1	6	4	2	1						1	1	3	1	1	1	8	7	8	8	8			107.63	0	0
10	OR010		61	2	1	Sosh	0			0	0				0				0					3			3	0																			30.77	0	0
11	OR011		66	2	1	Mabop	0			0	0				0				0					1	1	7	5	0						2	2	2				8	8	8	8	8			67.43	0	0
12	OR012		52	2	2	Pta N	0			0	1	1	10	1	0				1	5	1	10	3	2	1	9	2	1						3	3	3				9	9						1.24	0	0
13	OR013		47	1	1	Gaut	0			0	1	1	10	1	0				1	1	1	4	4	2	5	4	1	0						0													21.99	0	0
14	OR014		60	1	1		0			0	0				0				0					2			2	0																			27.67	0	0
15	OR015		26	1	4		0			0	1	1	4	1	0				0					2	4	1	2	1						1	2		1	1	1	2	7						67.99	0	0
16	OR016		63	2	1	Sosh	1			0	1	0			1	1	0		1	2	9	2	2	5	9	9	5	1						4	1	1	1			9	9	9	9	9			21.6	0	0
17	OR017		73	1	1		0			0	1	0			0				1	1	2	2	2	5	1	4	2	1						1	1	1	1	1	1	4	4	4	4	4			1.02	0	0
18	OR018		31	2	1		1			0	0				0				1	2	4	6		2	1	3	2	1						10	10	10	1	1	1	5	5	5	5	5			30.69	0	0
19	OR019		73	2	1		0			0	0				0				0						2	9	2	1						0													108.62	0	0
20	OR020		35	1	1	Hebron	0			0	0				0				0					1	2	3	2	0																			22.14	0	0
21	OR021		61	2	1	Hamm	0			0	0				0				0					4	1	9	4	0																			5.74	0	0
22	OR022		54	1	1	Gaut	0			0	1	1	10	1	0				1	1	8			2	1	9	2	1						1	1	1	1	1		8	8	8	8	8			1.86	0	0
23	OR023		65	2	1	Mabop	0			0	0				0				0					5		9	2	1						0													10.46	0	0
24	OR024		30	1	1		0			0	1	1	4	1	0				1	1	2	3	2	2	3	4	2	0						3	3	2				8	8	8	1	4			3.21	0	0
25	OR025		67	2		Gaut	0			0	0				0				0					3	4	9	4	1						0													21.97	0	0
26	OR026		35	1	1		0			0	0				0				1	1	6	1	1	3	10	5	2	0						0													64.13	0	0
27	OR027		57	1	1		0			0	1	1	5	2	0				0					3	10	8	4	1						1	1	1				9	9						89.28	0	0
28	OR028		56	2	1		0			0	0				0				0					2	1	9	2	1						1	1	1	1	1	1	9	9						67.11	0	0
29	OR029		23	2	1	Gaut	0			0	0				0				1	2	4	1	1	2	1	3	2	1						1	1	1	1	1	1	4	6	4	9	9			10.2	0	0
30	OR030		25	2	1		0			0	0				0				1	1	4		5	3	1	2	3	1						1	1	1	1	1	1	7	8	8					17.57	0	0
31	OR031		42	2	1		0			0	0				0				0					2	1	5	1	0						2	2	2	1	1	1	5	5			9			53.56	0	0
32	OR032		27	2	1	Mabop	0			0	0				0				1	2	6	6	6	2	2	5	3	1						1	2	1				7	8						10.3	0	0
33	OR033		34	2	1		0			0	0				0				1	2	5	2		2	2	2	3	1						2	4	1	1	1	2	2	4	4	4	4			23.65	0	0
34	OR034		38	2	1	NW	0			0	1	0			0				1	1	9	1	1	1	2	3	2	1						0													2.71	0	0
35	OR035		66	1	1	Sosh	0			0	1	1	10	1	0				0					2	1	1												1	1	2				9			6.23	0	0
36	OR036		34	1	1	Mabop	0			0	0				0				1	1	9	6	6	2	10	2	2	1						0													1.89	0	0
37	OR037		55	1	1	Brdr strm	0			0	1	0			0				0					4				1						0													33.52	0	0
38	OR038		58	2	1		0			0	0				0				0					2	1	2	2	0						0													13.92	0	0
39	OR039		41	1	1	Sosh	0			0	0				0				0					2	1	2	2	1						1	1	1	1	1	1	3	7						22.05	0	0
40	OR040		58	2	1	GaRan	0			0	0				0				1	2	8	1		2		9	2	0																			50.6	0	0
41	OR041		68	2	1	Tshwane	0			0	0				0				0					3	3	9	3	0																			24.66	0	0
42	OR042		54	2	1		0			0	0				1	6	0		0																												12.51	0	0
43	OR043		47	2	1	Mabop	0			0	0				0				0					2	1	7																					80.37	0	0
44	OR044		26	2	1		0			0	0				0				1	2	1	1	1	3	1	1	2	1						1	1	1	1	1	1	1	1	1	1	1			15.68	0	0
45	OR045		35	1	1	Gaut	0			0	1	1	2	5	0				1	3	5	2	1	2	10	7	2	1						1	3	1	1	1	1	6	9			8			24.6	0	0
46	OR046		68	2	1	Sosh	0			0	1	1	2	1	0				0					3	1	1	3	1						0													0.48	0	0
47	OR047		39	2	1		0			0	0				0				0					2			2	1						0													6.75	0	0
48	OR048		43	2	1		0			0	0				0				1	2	5	2	2	3	1	3	3	0																			3.02	0	0
49	OR049		48	1	1		0			0	0				0				0					3	1	4	3	0																			20.42	0	0
50	OR050		65	1	1	Sosh	0			0	0				0				0					3	10		3	1						0													5.71	0	0
51	OR051		42	2	1	Sosh	0			0	0				1	3	0		1	2	9	4	3	2	1	5	2	1						0													49.61	0	0
52	OR052		51	1	1	Sosh	0			0	0				0				0						1	9	3	0						0													2.57	0	0
53	OR053		33	1	1	Mabop	0			0	1	0			0				1	1	4	3	1	2	2	1	2	1						2	2	2	2	1	1	8	8	8	8	8			10.13	0	0
54	OR054		44	2	1	Sosh	0			0	0				0				0					2	1	4	2	1						0													0.14	0	0
55	OR055		51	1	1	Gaut	0			0	1	1	3	1	0				1	3	9	1	1	4	2	3	2	1						1						9	9	9	9	9			3.35	0	0
56	OR056		20	1	1	Limp	0			0	0				0				0					2	1	2	2	1						1	1	1				8	8						15.6	0	0
57	OR057		30	2	1	Mamel	0			0	0				0				0					3	2	1		0						0													8.02	0	0
58	OR058		29	1	1	Sosh	0			0	0				0				1	2	5	3	2	2	2	1	3	1						2	1	2	1	1	1	2	4		9	9			16.93	0	0
59	OR059						0			0	0				0				1	2	7	2		4	1	1	2	1						1	1	1	1	1	1	1	2	1					0.62	0	0
60	OR060		35				0			0	0				0				0						1	2	1	0						0													4.96	0	0
61	OR061		33	1	1		0			0	1	1	4	2	0				0					2	6	3	3	1						6	6	5	6	6	6	2	3	3	2	2			28.35	0	0
62	OR062		22	2	1	Sosh	0			0	0				0				0						1	6	2	1						1	1	1	1	1	1	6	6	6					19.77	0	0
63	OR063		48	2	1	Winterv	0			0	0				0				0					2	1	9	2	1						0													8.29	0	0
64	OR065		30	1	1		0			0	1	1	4	1	0				1	1	2	4	1	2	10	5	2	1						4	3	3	1	1	1	8	8	8	8	8			11.31	0	0
65	OR066		52	1	1	Sosh	0			0	0				0				0								4	1						0													9.7	0	0
66	OR067		60	2	1	Sosh	0			0	0				0				1	2	8	6		3	1	8	3	1						0													44.91	0	0
67	OR068		33	2	1	Gaut	0			0	0				0				1	2	4	2	1	3	2	3	3	0																			43.41	0	0
68	OR069		52	1	2	Gaut	0			0	1	1	10	1	0				1	1	9	10		2		9	2	1						6	10	6				9	9	9	9	9			21.74	0	0
69	OR070		65	2	1		0			0	0				0				0								1	1						0													37.8	0	0
70	OR071		64	1	1	Sosh	0			0	1	0			0				0					2	1	1	2	0						0													45.66	0	0
71	OR072		24	2	1		0			0	0				0				1	2	7	2	1	3	2	1	4	0						0													4.5	0	0
72	OR073		24	2	1	Pta N	0			0	0				0				1	2	7	2	1	1	1	5	2	1						2	3	1				9	9	9	9	9			20.53	0	0
73	OR074		62	1	1	East Rand	0			0	1	0			0				1	1	2	4		2	1	5	2	1						7	1	7						9	9	9			7.23	0	0
74	OR075		25	2	1		0			0	0				0				1	2	8	1	1	2	1	4	1	1						10	9	10	1	1	1	6	6		5	6			7.13	0	0
75	OR076		52	2	1		0			0	0				0				0									0						0													31.1	0	0
76	OR077		43	1	1		0			0	0				0				0					1	2	1	1	1						0													13.28	0	0
77	OR078		49	2	1		0			0	0				0				0					4	1	4	2	0						0													19.24	0	0
78	OR079		64	2	1	Sosh	0			0	0				0				0					4	2	9	2	0						0													46.42	0	0
79	OR080		56	1	1	Sosh	0			0	0				0				1	2	9	1		3	2	1	3	0						0													10.93	0	0
80	OR081		39	1	1	Hamm	1			0	0				0				0							2		0						0													7.22	0	0
81	OR082		59	1	1	GaRan	1			0	1	1	10	1	0				1	2	3	2	2	2	2	8	2	0																			13.9	0	0
82	OR083		24	2	1	Sosh	0			0	0				0				0					2	1	4	2	1						2	1	1	1	1	1	4		4					120	0	0
83	OR084		25	1	1	Pret	0			0	0				0				1	3	1	3	1	1	5	1	2	1						1	1	1	1	1	1	4	8						91.01	0	0
84	OR085		28	1	1	Mabop	0			0	1	1	3	1	0				0					1	3	3	2	1						2	6	6	2	2	2	5	5	5	4	4			12.57	0	0
85	OR086		30	2	1	Sosh	0			0	0				0				1	2	4	2	1	2	1	8	3	1						2	2	1				9	9	9	9	9			56.83	0	0
86	OR087		24	1	1		0			0	0				0				1	1	3	5	5	1	7	1	2	0																			14.04	0	0
87	OR088		60	2		NW	0			0	1	1	7	1	0				1	1	3			2		9	2	0																			21.41	0	0
88	OR089		30	1	1	Gaut	0			0	1	1	7	1	0				1	3	1	2	7	2	6	2	2	1						4	6	3	1	2	2	9	9	9	9	9			15.66	0	0
89	OR090		38	2	1	Sosh	0			0	0				0				1	2	2	1	3	3	2	4	3	1						0													14.11	0	0
90	OR091		38	2	1		0			0	0				0				0					3		1	3							1		1						4					90.54	0	0
91	OR092		50	1	1	Rusten	0			0	1	1	2	1	0				0					1	1	9	2	1						2	2	6	3	3	6	9	9						22.19	0	0
92	OR093		41		1	Mabop	0			0	0				0				1	2	4			1	2	7	1	0																			6.88	0	0
93	OR094		25	2	1	GaRan	0			0	0				0				0					2	2	9	2	0																			53.08	0	0
94	OR095		37	1	1		0			0	0				0				1	1	5	6	5	3	1	2	2	0						0													13.1	0	0
95	OR096		49	2	3	NW	0			0	1	0			1		1	4	0					2	1	7	3	0																			0.18	0	0
96	OR097		43	2	1	Sosh	0			0	0				0				0					2			3	1						0													11.49	0	0
97	OR098		33	2	1	Winterv	0			0	0				0				1	2	7			2		5	2	1						5	5	5	1	1	1	3	6	7	9	9			5.56	0	0
98	OR099		30	2	1	Sosh	0			0	0				0				0					2	1	3	2	1						2	2	2											6.22	0	0
99	OR100		74	2	1	Mmakau	0			0	0				0				0					3	1	9	3	0																			25.94	0	0
100	OR101		42	2	1	GaRan	0			0	0				0				1	2	5	2	3	2	4	3	2	1						2	2	1	1	1		4	9			4			0.83	0	0
101	OR102		59	2	1	Mabop	0			0	0				0				1	2	9	2	1	2	5	1		0																			10.5	0	0
102	OR103		22	1	1	Hamm	0			0	1	0			0				1	2	9	2	1	2	4	2		1						0													83.35	0	0
103	OR104		22	1	1	Winterv	0			0	0				0				0						1	5		0						0													73.01	0	0
104	OR105		27	1	1	Mabop	0			0	0				0				1	1	3	2	1	2	1	3	3	1						0													12.42	0	0
105	OR106		47	1	1	Montana	0			0	0				0				0					2	2	9	2	1						0													2.06	0	0
106	OR107		66	1	1	Sosh	0			0	0				0				1	1	1	2	2	5	3	2	2	0																			1.71	0	0
107	OR108		26	1	1	NW	0			0	1	1	10	1	0				1	3	2	4	4	2	10	4	2	1						1		1	1	3		4	5	5					23.38	0	0
108	OR109		39	1	1	Mabop	0			0	1	1	6	1	0				1	3	1		1	1	1	1	1	1						1	2	2		1	1	6	6	6	7	7			6.26	0	0
109	OR110		47	1	1	Sosh	0			0	0				0				1	1	1	4		2	1	7	2	0																			120	0	0
110	OR111		62	2	1	GaRan	0			0	0				0				0					3	3	9	3	0																			42.5	0	0
111	OR112		53	1	1	Sosh	0			0	0				0				0					2	10	5	3	0																			50.08	0	0
112	OR113		42	2	1	Mabop	0			0	0				0				0					5		9	2	1						2	2	2		1	1	2	6	9	9	9
113	OR114		22	1	1	Pret	0			0	0				0				1	1	6	1	1	2	1	1	3	1						1	1	1	1	1	1	2	2						3.43	0	0
114	OR115		29	2	1		0			0	0				0				1	2	6	4		2	10	2	2	1						7	7	7	1					2	2	2			76.53	0	0
115	OR116		62	1	1	Mabop	0			0	0				0				0					5	1	1	5	0																			49.83	0	0
116	OR117		60	2	1	Sosh	0			0	0				0				0					2	4	9	2	0																			0.02
117	OR118		34	1	1	Brits	0			0	1	1		10	0				1	2	3	4	4	2	2	5	2	1						2	2	2				9	9	9	9	9			12.77	0	0
118	OR119		28	1	1	NW	0			0	1	1	10	1	0				1	1	7	10	10	1	10	7	1	1						0													2.34	0	0
119	OR120		36	1	1	GaRan	0			0	0				0				1	1	3	10	4	3	2	1	2	1						4	6	2	1	2	2	1	1	1	1	1			18.57	0	0
120	OR121		23	2	1	Pret	0			0	0				0				1	1	6	1	1	2	2	3	2	1						1	1	1	1	1	1	5	6	5	6	6			2.25	0	0
121	OR122		58	2	1	Sosh	0			0	0				0				0							9	3	0						0													8.89	0	0
122	OR123		64	2	1	Sosh	0			0	1	1	2	9	0				0					2	1	7	1	0																			4.89	0	0
123	OR124			1	1		0				0				0				0						2	1	3	1						1	1	1	1	1	1	3	3	3					21.94	0	0
124	OR125		29	2	1	GaRan	0			0	0				0				1	4	4	3	4	2	2	1	4	1						1	1	1											0.77	0	0
125	OR126		48	1	1	Akasia	0			0	1	0			0				1	1	1	4	1	2	3	3	3	1						2	2	1	1	1	1	9	9	9	1	9			4.86	0	0
126	OR127		24	1	1	Tshwane	0			0	0				0				1	1	3	8	8	2	6	2	2	1						2	4	2	1	1	1	4	4						3.97	0	0
127	OR128		42	2	1	Gaut	0			0	0				0				0					2	1	1	2	1						1	1	1	1	1	1	3	3						3.18	0	0
128	OR129		21	2	1		0			0	0				0				1	2	4	1	2	2	2	6		1						0													11.15	0	0
129	OR130		24	2	1	Sosh	1			0	0				0				0					2	2	5	2	0																			0.47	0	0
130	OR131		22	2	1	Polokw	0			0	0				0				1	1	6	1	1	1	3	2	1	1						2	3	2	1	1	1	2	2						1	0	0
131	OR132		22	2	1		0			0	0				0				1	2	9		1	1	2	9		1						0													21.39	0	0
132	OR133		55	2	1		0			0	0				0				0					2			2	1						3	3	3				9	9	9					1.22	0	0
133	OR134		54	2	1	Sosh	0			0	0				0				1	2	5	1	1	2	1	5	2	0																			46.47	0	0
134	OR135		43	2	1	Gaut	0			0	0				0				1	2	6		1	2	1	5	2	1						4	1	1				9	9						32.86	0	0
135	OR136		59	1	1	Sosh	0			0	0				0				0					3	1	3	3	0																			79.07	0	0
136	OR137		43	1	1		0			0	1	0			0				0					2	1	1	2	1						2	2	2				9	9						3.76	0	0
137	OR138		49	1	1	Gaut	0			0	0				0				1	1	1	6	2	2	1	2	3	1						3	4	4	1	1	1	2	5						30.51	0	0
138	OR139		42	2	1	Gaut	0			0	0				0				1	2	4	2	2	2	4	2	2	1						1	1	1				9	9	9					108.96	0	0
139	OR140		72		2	NW	0			0	1	0			0				1	3	1	10	3	2	1	2	2	1						7	7	7	1	1	1	5	5						17.8	0	0
140	OR141		60	1	2	Jhb	0			0	1	0			0				1	3	1	10	2	2	1	3	2	1						10	10	10				9	9
141	OR142		25	2	1		0			0	0				0				1	2	2	1	5	3	1	2	3	1						2	2	2	1	1	1	2	2			9			23.38	0	0
142	OR143		48	2	1	Gabalat	0			0	0				0				0					2	1	1	2	1						0													21.49	0	0
143	OR144		20	2	1		0			0	0				0				1	5	9	1	1	2	1	4	3	1						0													31.98	0	0
144	OR145		38	2	1		0			0	0				0				0						1	9	3	0						0													63.96	0	0
145	OR146		35	1	1	Soweto	0			0	1	1	10	1	0				1	3	9		1	5	1	5	2	1						1	10	10	1	1	1	9	9						20.04	0	0
146	OR147		51	1	1	Rusten	0			0	1	0			0				0								4	0						0													65.94	0	0
147	OR148		54	1	1	Madibeng	0			0	1	0			0				0					2	4	2	2	1						0													56.27	0	0
148	OR149		21	1	1		1			0	1	1	3	2	0				1	1	4	1	5	1	4	4	2	0																			53.64	0	0
149	OR150		33	1	1	GaRan	0			0	1	1	6	1	0				1	1	2	4	4	2	2	3	2	1						0													92.51	0	0
150	TS1		36	2	1		1	167	0	0	0				0				0					3	1	3	3	1						2	2	2	2	1	1	3	3	3	4	4	5	0	5.01	0	0
151	TS2		49	2	1		1	240	0	0	0				0				0					2	0	9	2	1						1		1					9				5	0	13.79	0	0
152	TS3		37	1	1		1	593	0	0	1	1	7	1	0				1	1	2	8	4	2	10	3	2	1						10	5	3	3	3	3	3	3	3	2	3	20	0	5.61	0	0
153	TS4		23	2	1		1	158	0	0	0				0				0					2	2	6	3	0						0											1	thrush	22.16	0	0
154	TS5		47	1	1		1	74	95	0	1	0			0				1	1	9	1	1	2	10	9	1	1						0											20	0	19.07	0	0
155	TS6		59	1	1		1	181	0	0	1	1	2	1	0				1	3	9	3	2	2	0	9	2	1						5	5	3				9	9	9	9	9	15	0	26.25	0	0
156	TS7		49	2	1		1	344	0	0	0				0				1	2	9	2	2	2	2	4	2	0						0											4	0	7.62	0	0
157	TS8		43	2	1		1	346	7456	0	0				0				0					2	1	6	2	1						1	1	1				9	9	9			6	0	26.6	0	0
158	TS9		48	2	1		1	127	924	0	0				0				0					2	2	2	1	1						2	2	2	1	1	1	6	6	6	6	6	2	0	0.49	0	0
159	TS10		41	2	1		1	476	2077	0	0				0				0					2	5	1	2	1						0											4	0	8.45	0	0
160	TS11		29	2	1		1	549	0	0	0				0				0					1	6	4	2	1						4	4	2	1	1	1	4	6				8	0	8.62	0	0
161	TS12		37	2	1		1	700	0	0	0				0				0					3	1	9	2	1						2	1	1				8	9	9			2	0	26.22	0	0
162	TS13		53	1	1		1	208	0	0	0				0				1	1	9	5	1	3	2	8	3	1						2	2	2				9	9	9	8	8	8	0	33.51	0	0
163	TS14		57	2	1		1	649	0	0	1	0			1	3	0		1	5	3	1	1	2	0	9	2	0						0											4	0	5.75	0	0
164	TS15		25	2	1		1	93		0	0				0				0					2	4	7	3	1						1	1					8	8				2	0	3.57	0	0
165	TS16		60	1	1		1	637	0	0	1	0			1	5	0		1	1	2	2	2	3	0	9	2	0						0											14	0	1.7	0	0
166	TS17		37	2	1		1	303		0	0				0				1	5	9	1	1	2	1	9	3	1						1		1					9	9			6	0	17.82	0	0
167	TS18		44	1	1		1	198	60	0	0				0				1	4	9	1	1	2	0	9	2	1						0											5	0	16.26	0	0
168	TS19		44	1	1		1	25		0	0				0				1	1	9	10	4	2	2	8	2	1						1	1					9					15	0	3.75	0	0
169	TS20		30	1	1		1	7	69368	0	0				0				0					2	1	3	2	0						0											1	0	8.66	0	0
170	TS21		52	2	1		1	105	298	0	0				0				0					3	0	9	3	0						0											3	0	0.63	0	0
171	TS22		37	2	1		1	34	4712	0	0				1	10	1	10	1	2	8	4	4	1	1	7	1	1						4	4	4				8	8	8	3	3	6	0	4.73	0	0
172	TS23		48	1	1		1	315	0	0	0				0				0					5	2	6	5	1						0											3	0	3.03	0	0
173	TS24		40	1	1		1	196		0	1	1	5	1	0				1	1	2	4	4	2	3	5	2	1						2	2	2				9	9				3	0	16.96	0	0
174	TS25		43	2	1		1	378	0	0	0				0				0					3	0	9	3	1						0											3	0	8.11	0	0
175	TS26		35	1	1		1	294	0	0	1	0			0				1	1	8	7	7	3	4	4	3	1						2	2	1	1	1		4	9	4			4	0	16.39	0	0
176	TS27		36	2	1		1	117	38960	0	0				0				0					2	1	9	3	0						0											2	0	14.91	0	0
177	TS28		43	1	1		1	340	637	0	0				0				0					3	1	1	3	1						0											4	0	12.67	0	0
178	TS29		40	1	1		1	773	0	0	1	1	4	1	0				0					2	2	1	2	1						5	5	1	1	1	1	3	3				14	0	0.12
179	TS30		48	2	1		1	354	0	1	0				0				0					2	0	9	2	1						0											4	0	3.39	0	0
180	TS31		55	2	1		1	465	0	0	0				1	2	0		0					1	1	8	1	0						0											2	0	2.56	0	0
181	TS32		52	2	1		1	509	86	0	0				0				0					2	1	4	2	1						4	4	4	1	1	1	5	5				4	0	8.57	0	0
182	TS33		54	1	1		1	588	0	1	1	0			0				1	3	3	1	1	3	2	3	2	1						1	1					9					15	0	49.35	0	0
183	TS34		43	1	1		1	62	144	0	0				0				1	1	3	2	2	2	1	4	2	1						10	10	10	1	1		4	9				15	0	22.8	0	0
184	TS35		37	2	1		1	395	43	0	0				0				1	5	3	2	2	2	2	3	2	1						10	10	10	2	2	1	5	4	4	3	3	10	0	5.51	0	0
185	TS36		38	1	1		1	157	5908	0	0				0				1	1	5	1	1	2	10	3	2	1						10	10	10	1	1	1	2	6				20	0	28.33	0	0
186	TS37		62	2	1		1	359	0	0	0				0				0					2	0	9	2	0						0											1	0	16.28	0	0
187	TS38		67	2	1		1	284	0	0	1	0			0				0					2	0	9	2	0						6	6	6	1	1	1	9	9				7	0	8.18	0	0
188	TS39		42	1	1		1	264	2147	0	0				0				1	1	9	1	1	3	2	5	3	1						0											2	0	26.18	0	0
189	TS40		44	2	1		1	515	297	0	0				0				0					2	0	9	2	1						3	3					9					4	0	9.35	0	0
190	TS41		47	2	1		1	573	502	0	0				1	5	0		0					2	0	9	2	0						0											2	0	1.82	0	0
191	TS42		63	2	1		1		0	0	0				0				0					2	5	5	2	1						0											20	0	3.39	0	0
192	TS43		26	1	1		1	73	0	0	1	1	3	2	0				1	1	1	2	4	2	7	3	1	1						1	1					9					12	0	7.94	0	0
193	TS44		58	2	1		1	334	87000	0	0				0				0					2	0	9	2	1						1	1	1				9	9				3	0	0.63	0	0
194	TS45		26	2	1		1	539		0	0				0				1	2	8	2	1	2	2	5	2	1						1		1					8				3	0	21.07	0	0
195	TS46		49	1	1		1		769956	0	1	0			0				1	1	9	10	6	2	1	1	2	1						1	1	1				8	8				10	0	5.01	0	0
196	TS47		58	1	1		1	157		0	0				0				1	1	9	6	1	2	1	5	2	0						0											7	0	9.98	0	0
197	TS48		39	2	1		1	47	60185	0	0				0				1	2	9	1	1	3	1	5	3	1						0											2	0	21.65	0	0
198	TS49		24	2	1		1	600	0	1	1	0			0				1	5	5	8	6	2	10	1	2	1						2	2	2	2	2	2	3	3	3	1	1	5	0	19.74	0	0
199	TS50		60	2	1		1	398	0	0	1	0			0				0					2	1	9	3	0						0											4	0	0.17	0	0
200	TS51		52	1	1		1	406	0	0	0				0				0					2	3	5	2	0						0											10	0	9.03	0	0
201	TS52		39	1	1		1	520		0	1	0			0				1	1	6	1	1	3	1	5	4	0						0											10	0	2.16	0	0
202	TS53		62	1	1		1	451	120	0	0				0				0					2	0	9	3	1						0											4	0	9.42	0	0
203	TS54		46	1	1		1	38	0	0	0				0				1	3	9	1	1	2	0	9	3	0						0											9	0	7.99	0	0
204	TS55		55	1	1		1	490	650	1	1	0			0				1	1	3	3	1	2	1	6	2	1						0											6	0	19.3	0	0
205	TS56		72	1	1		1	159	0	0	0				0				1	1	3	6	1	2	1	5	2	0						2		2					9				5	0	35.05	0	0
206	TS57		42	1	1		1	53	0	0	0				0				1	1	5	7	1	3	1	1	3	0						0											3	0	6.6	0	0
207	TS58		42	2	1		1	512	0	0	0				0				0					2	1	8	2	1						1	1					8					4	0	4.09	0	0
208	TS59		56	2	1		1		0	0	0				1	2	0		1	2	4	1	2	2	0	9	2	0						0											4	0	0.45	0	0
209	TS60		63	2	1		1	609	0	0	0				1	1	0		1	2	4	1	1	2	0	9	1	1						0											1	0	3.22	0	0
210	TS61		40	1	1		1	250	0	0	1	1	1	1	0				1	1	2	3	3	2	2	3	2	1						1	1	1				9	9				11	0	1.94	0	0
211	TS62		45	1	1		1	359	0	0	0				0				1	1	8	1	1	2	4	3	2	1						2	0	2									10	0	7.22	0	0
212	TS63		45	1	1		1	326	0	0	1	0			0				1	1	9	10	3	2	2	9	2	0						0											8	0	4.06	0	0
213	TS64		53	1	1		1	190	0	0	1	1	7	1	0				1	5	2	4	4	3	0	9	2	0						0											10	0	2.18	0	0
214	TS65		66	2	1		1	257	0	0	0				1	4	0		1	2	3	1	1	3	0	9	3	1						1	1					9					10	0	2.85	0	0
215	TS66		43	1	1		1	296	0	0	0				0				1	1	9	2	2	2	1	3	1	1						3	3	3	0	0	0	8	8				5	0	64.31	0	0
216	TS67		56	1	1		1	91	2446696	0	1	1	9	2	0				1	1	2	1	6	2	0	9	2	1						0											8	0	16.21	0	0
217	TS68		35	2	1		1	153	0	0	0				0				0					2	1	8	2	0						0											3	0	54.27	0	0
218	TS69		28	2	1		1	593	0	0	0				0				1	5	4	5	5	2	1	6	2	1						0											3	0	3.1	0	0
219	TS70		69	1	1		1	93		0	0				1	2	0		1	1	2	2	2	2	0	9	2	0						0											10	0	15.15	0	0
220	TS71		35	2	1		1	240	18697	0	0				0				1	2	2	3	1	2	2	2	2	1						1	1					9					3	0	8.81	0	0
221	TS72		53	2	1		1			0	0				0				0					2	1	6	3	1						3	3	3	3	3	3	6	6	6	6	6	5	0	5.95	0	0
[truncated: 30 more columns]

## Sheet: Code sheet
Variable	Meaning	Type	Units	Coding
Heading: Study number	OR=Dental Hospital; TS=HIV-management clinic
Age	Age	continuous	years
Gender	Gender	categorical		1=male	2=female
Ethnic	Ethnicity	categorical		1=African	2=White	3=Indian	4=Coloured
region	Area where participant's residence is located	text
HIV status	HIV status	categorical		0=negative	1=positive
CD4	CD4 white cell count	continuous	numerical
VL	Most recently recorded viral load	continuous	numerical
tonsil/bed	whether tonsils are present or not.	categorical		0=no tonsil	1=tonsil
Ever Tob	Ever used tobacco	categorical		0=No	1=Yes
Curr smoke	Current smoker	categorical		0=No	1=Yes
Nr p/d	How many cigarettes per day	continuous	numerical
last smoke	Last cigarette smoked	categorical		1=1 day	2=2-4 days	3=5-7 days	4=1-3 weeks	5=1 month	6=2-3 months	7=4-6 months	8=7 months -1 year	9=more than 1 year
snuff	Current snuff user	categorical		0=No	1=Yes
snuff p/d	How many times per day is snuff used	continuous	numerical
snuff oral	Snuff is placed in the mouth	categorical		0=No	1=Yes
sn oral p/d	How many times per day is snuff placed in mouth	continuous	numerical
Alch ever	Ever consumed alcohol	categorical		0=No	1=Yes
Fav alch	Favourite alcohol-containing drink	categorical		1=Beer	2=Wine	3=Whiskey	4=Vodka	5=Other
Last Alch	Last alcohol-containing drink consumed	categorical		1=1 day	2=2-4 days	3=5-7 days	4=1-3 weeks	5=1 month	6=2-3 months	7=4-6 months	8=7 months -1 year	9=more than 1 year
Week Alch	How many alcohol units per week	continuous	numerical
unit/day	How many alcohol units per day	continuous	numerical
1st kiss	Age at first open mouth kiss	categorical		1=10-14 years	2=15-19years	3=20-24 years	4=25-30years	5=30 years or older
2 yr nr	Number of open mouth kiss partners past 2 years	continuous	numerical
last kiss	Last open mouth kiss	categorical		1=1 day	2=2-4 days	3=5-7 days	4=1-3 weeks	5=1 month	6=2-3 months	7=4-6 months	8=7 months -1 year	9=more than 1 year
1st sex	Age at first sexual encounter	categorical		1=10-14 years	2=15-19years	3=20-24 years	4=25-30years	5=30 years or older
Know OS	Knows what is oral sex	categorical		0=No	1=Yes
ever rec	Has ever received oral sex	categorical		0=No	1=Yes
ever give	Has ever given oral sex	categorical		0=No	1=Yes
curr rec	Still receives oral sex	categorical		0=No	1=Yes
curr give	Still gives oral sex	categorical		0=No	1=Yes
O/S p life	Lifetime oral sex partners	continuous	numerical
given to life	Lifetime partners that gave oral sex to participant	continuous	numerical
rec from life	Lifetime partners that received oral sex from participant	continuous	numerical
O/S p curr	Number of current oral sex partners	continuous	numerical
nr curr give to	Partners currently giving oral sex to participant	continuous	numerical
nr curr rec from	Partners currently receiving oral sex from participant	continuous	numerical
last rec	Last time oral sex was received	categorical		1=1 day	2=2-4 days	3=5-7 days	4=1-3 weeks	5=1 month	6=2-3 months	7=4-6 months	8=7 months -1 year	9=more than 1 year
last gave	Last time oral sex was given	categorical		1=1 day	2=2-4 days	3=5-7 days	4=1-3 weeks	5=1 month	6=2-3 months	7=4-6 months	8=7 months -1 year	9=more than 1 year
last o/s	Last time participant had oral sex (multiple partner)	categorical		1=1 day	2=2-4 days	3=5-7 days	4=1-3 weeks	5=1 month	6=2-3 months	7=4-6 months	8=7 months -1 year	9=more than 1 year
time betw give	Elapsed time between giving oral sex to different partners	categorical		1=1 day	2=2-4 days	3=5-7 days	4=1-3 weeks	5=1 month	6=2-3 months	7=4-6 months	8=7 months -1 year	9=more than 1 year
time betw rec	Elapsed time between receiving oral sex from different partners	categorical		1=1 day	2=2-4 days	3=5-7 days	4=1-3 weeks	5=1 month	6=2-3 months	7=4-6 months	8=7 months -1 year	9=more than 1 year
life sex p	number of lifetime sexual partners	continuous	numerical
O lesions	Oral lesions present in the mouth at the time of investigation	descriptive	text
DNA concentration	DNA concentration contained in specimen sample	continuous	numerical
catHPV06	Presence or absence of this specific type of HPV	categorical		0=not present	1=present
catHPV11	Presence or absence of this specific type of HPV	categorical		0=not present	1=present
catHPV16	Presence or absence of this specific type of HPV	categorical		0=not present	1=present
catHPV18	Presence or absence of this specific type of HPV	categorical		0=not present	1=present
catHPV31	Presence or absence of this specific type of HPV	categorical		0=not present	1=present
catHPV33	Presence or absence of this specific type of HPV	categorical		0=not present	1=present
catHPV35	Presence or absence of this specific type of HPV	categorical		0=not present	1=present
catHPV39	Presence or absence of this specific type of HPV	categorical		0=not present	1=present
catHPV45	Presence or absence of this specific type of HPV	categorical		0=not present	1=present
catHPV51	Presence or absence of this specific type of HPV	categorical		0=not present	1=present
catHPV52	Presence or absence of this specific type of HPV	categorical		0=not present	1=present
catHPV53	Presence or absence of this specific type of HPV	categorical		0=not present	1=present
catHPV56	Presence or absence of this specific type of HPV	categorical		0=not present	1=present
catHPV58	Presence or absence of this specific type of HPV	categorical		0=not present	1=present
catHPV59	Presence or absence of this specific type of HPV	categorical		0=not present	1=present
catHPV66	Presence or absence of this specific type of HPV	categorical		0=not present	1=present
catHPV67	Presence or absence of this specific type of HPV	categorical		0=not present	1=present
catHPV68	Presence or absence of this specific type of HPV	categorical		0=not present	1=present
HPV 16/18	Summary of presence or absence of HPV 16 and HPV 18	categorical		0=not present	1=present
hrHPV	Summary of presence or absence of High Risk HPV types	categorical		0=not present	1=present
lrHPV	Summary of presence or absence of low-risk HPV types	categorical		0=not present	1=present
catHPV1/63	presence or absence of these beta-HPV types	categorical		0=not present	1=present
catHPV2/27/57	presence or absence of these beta-HPV types	categorical		0=not present	1=present
cat HPV3/10	presence or absence of these beta-HPV types	categorical		0=not present	1=present
catHPV4/60/65	presence or absence of these beta-HPV types	categorical		0=not present	1=present
catPV7/41	presence or absence of these beta-HPV types	categorical		0=not present	1=present
betaHPV	Summary of presence or absence of beta HPV types	categorical		0=not present	1=present
DNAstatusFINAL	Sufficiency of DNA in specimen	categorical		0=DNA insufficient	1=DNA sufficient
HPVresultFINAL	Final result of HPV positivity or negativity for Riatol	categorical		0=negative	1=low risk HPV positive	2=high risk HPV positive	3=DNA insufficient
Abbott	HPV presence or absence using Abbott PCR	categorical		0=not present	1=present
Type	Type category of HP found with abbot PCR	categorical		1=other HR HPV type	2=HPV 16	3=HPV 18
Value	CT value used in laboratory related to Abbott only	continuous	numerical
